# Supplementary material
Source: PubMed Central journal article supplement (PMC8902441)

## SUPPLEMENTARY MATERIAL

### Supplementary Tables

**Supplementary Table 1.** Multivariable Cox proportional hazards model: effect of temporary ovarian suppression, tumor size, axillary nodes, and hormone receptor status on disease-free survival<sup>a</sup> (N = 281)<sup>b</sup>

**Supplementary Table 2.** Multivariable Cox proportional hazards model: effect of temporary ovarian suppression, tumor size, axillary nodes, hormone receptor status, type of chemotherapy, timing of chemotherapy, and use of GnRHa after the end of chemotherapy on disease-free survival<sup>a</sup>

**Supplementary Table 3.** Multivariable Cox proportional hazards model: effect of temporary ovarian suppression, tumor size, axillary nodes, and hormone receptor status on overall survival<sup>a</sup> (N = 281)<sup>b</sup>

**Supplementary Table 4.** Multivariable Cox proportional hazards model: effect of temporary ovarian suppression, tumor size, axillary nodes, hormone receptor status, type of chemotherapy, timing of chemotherapy, and use of GnRHa after the end of chemotherapy on overall survival<sup>a</sup>

**Supplementary Table 5.** Pregnancy outcome according to treatment arm

**Supplementary Table 6.** Baseline patient and tumor characteristics according to *BRCA* status

### Supplementary Figures

**Supplementary Figure 1.** Cumulative incidence of pregnancy after breast cancer according to treatment arm

This supplementary material has been provided by the authors to give readers additional information about their work

**Supplementary Table 1.** Multivariable Cox Proportional Hazards Model: Effect of Temporary Ovarian Suppression, Tumor Size, Axillary Nodes, and Hormone Receptor Status on Disease-free Survival<sup>a</sup> (N = 281)<sup>b</sup>

| Variable                       | Patients/Events <sup>c</sup> | HR (95% CI)      | <i>P</i> <sup>d</sup> |
|--------------------------------|------------------------------|------------------|-----------------------|
| Random assignment              |                              |                  |                       |
| Control arm                    | 133/39                       | 1 [Reference]    | .68                   |
| GnRHa arm                      | 148/48                       | 1.10 (0.72-1.68) |                       |
| Tumor size (T)                 |                              |                  |                       |
| pT1                            | 166/47                       | 1 [Reference]    | .48                   |
| pT2-4                          | 115/40                       | 1.17 (0.76-1.80) |                       |
| Axillary nodes (N)             |                              |                  |                       |
| pN0                            | 130/31                       | 1 [Reference]    | .01                   |
| pN1-2                          | 151/56                       | 1.74 (1.11-2.72) |                       |
| Hormone receptor status        |                              |                  |                       |
| ER-negative and PR-negative    | 55/19                        | 1 [Reference]    | .23                   |
| ER-positive and/or PR-positive | 226/68                       | 0.72 (0.43-1.21) |                       |

<sup>a</sup> Disease-free survival interval was computed from the date of randomization to the date of the occurrence of an event. Observation times of patients without a disease-free survival event were censored on the date of last contact. HR = hazard ratio; CI = confidence interval; GnRHa = gonadotropin-releasing hormone analogs; ER = estrogen receptor; PR = progesterone receptor.

<sup>b</sup> After single imputation of missing values on at least one covariate in seven patients.

<sup>c</sup> Disease-free survival event was defined by the occurrence of local recurrence, distant metastases, contralateral or ipsilateral breast tumor, second primary malignancy, or death from any cause, whichever occurred first.

<sup>d</sup> Two-sided likelihood-ratio test.

**Supplementary Table 2.** Multivariable Cox proportional hazards model: effect of temporary ovarian suppression, tumor size, axillary nodes, hormone receptor status, type of chemotherapy, timing of chemotherapy, and use of GnRHa after the end of chemotherapy on disease-free survival<sup>a</sup>

| Variable                                                | HR (95% CI)      | <i>P</i> <sup>b</sup> |
|---------------------------------------------------------|------------------|-----------------------|
| Random assignment                                       |                  |                       |
| Control arm                                             | 1 [Reference]    | .50                   |
| GnRHa arm                                               | 1.16 (0.75-1.81) |                       |
| Tumor size (T)                                          |                  |                       |
| pT1                                                     | 1 [Reference]    | .54                   |
| pT2-4                                                   | 1.15 (0.73-1.82) |                       |
| Axillary nodes (N)                                      |                  |                       |
| pN0                                                     | 1 [Reference]    | .01                   |
| pN1-2                                                   | 1.92 (1.14-3.22) |                       |
| Hormone receptor status                                 |                  |                       |
| ER-negative and PR-negative                             | 1 [Reference]    | .33                   |
| ER-positive and/or PR-positive                          | 0.72 (0.37-1.40) |                       |
| Type of chemotherapy                                    |                  |                       |
| Anthracycline- and taxane-based                         | 1 [Reference]    | .10                   |
| Anthracycline-based                                     | 1.04 (0.61-1.78) |                       |
| CMF-based                                               | 3.07 (1.19-7.90) |                       |
| Timing of chemotherapy                                  |                  |                       |
| Adjuvant therapy                                        | 1 [Reference]    | .09                   |
| Neoadjuvant therapy                                     | 1.83 (0.95-3.52) |                       |
| Use of GnRHa after the end of chemotherapy <sup>c</sup> |                  |                       |
| No                                                      | 1 [Reference]    | .68                   |
| Yes                                                     | 1.12 (0.65-1.95) |                       |

<sup>a</sup> Disease-free survival interval was computed from the date of randomization to the date of the occurrence of an event. Observation times of patients without a disease-free survival event were censored on the date of last contact. HR = hazard ratio; CI = confidence interval; GnRHa = gonadotropin-releasing hormone analogs; ER = estrogen receptor; PR = progesterone receptor; CMF = cyclophosphamide, methotrexate, fluorouracil.

<sup>b</sup> Two-sided likelihood-ratio test.

<sup>c</sup> Time-dependent.

**Supplementary Table 3.** Multivariable Cox Proportional Hazards Model: Effect of Temporary Ovarian Suppression, Tumor Size, Axillary Nodes, and Hormone Receptor Status on Overall Survival<sup>a</sup> (N = 281)<sup>b</sup>

| Variable                       | Patients/Events | HR (95% CI)      | <i>P</i> <sup>c</sup> |
|--------------------------------|-----------------|------------------|-----------------------|
| Random assignment              |                 |                  |                       |
| Control arm                    | 133/23          | 1 [Reference]    | .83                   |
| GnRHa arm                      | 148/28          | 1.06 (0.61-1.85) |                       |
| Tumor size (T)                 |                 |                  |                       |
| pT1                            | 166/24          | 1 [Reference]    | .14                   |
| pT2-4                          | 115/27          | 1.53 (0.87-2.68) |                       |
| Axillary nodes (N)             |                 |                  |                       |
| pN0                            | 130/15          | 1 [Reference]    | .01                   |
| pN1-2                          | 151/36          | 2.14 (1.16-3.94) |                       |
| Hormone receptor status        |                 |                  |                       |
| ER-negative and PR-negative    | 55/13           | 1 [Reference]    | .19                   |
| ER-positive and/or PR-positive | 226/38          | 0.64 (0.34-1.22) |                       |

<sup>a</sup> Overall survival interval was computed from the date of randomization to the date of the death. Observation times of patients without an overall survival event were censored on the date of last contact. HR = hazard ratio; CI = confidence interval; GnRHa = gonadotropin-releasing hormone analogs; ER = estrogen receptor; PR = progesterone receptor.

<sup>b</sup> After single imputation of missing values on at least one covariate in seven patients.

<sup>c</sup> Two-sided likelihood-ratio test.

**Supplementary Table 4.** Multivariable Cox Proportional Hazards Model: Effect of Temporary Ovarian Suppression, Tumor Size, Axillary Nodes, Hormone Receptor Status, Type of Chemotherapy, Timing of chemotherapy, and Use of GnRHa after the end of chemotherapy on Overall Survival<sup>a</sup>

| Variable                                                | HR (95% CI)      | <i>P</i> <sup>b</sup> |
|---------------------------------------------------------|------------------|-----------------------|
| Random assignment                                       |                  |                       |
| Control arm                                             | 1 [Reference]    | .60                   |
| GnRHa arm                                               | 1.16 (0.65-2.08) |                       |
| Tumor size (T)                                          |                  |                       |
| pT1                                                     | 1 [Reference]    | .15                   |
| pT2-4                                                   | 1.54 (0.85-2.79) |                       |
| Axillary nodes (N)                                      |                  |                       |
| pN0                                                     | 1 [Reference]    | .02                   |
| pN1-2                                                   | 2.22 (1.09-4.51) |                       |
| Hormone receptor status                                 |                  |                       |
| ER-negative and PR-negative                             | 1 [Reference]    | .90                   |
| ER-positive and/or PR-positive                          | 1.05 (0.47-2.35) |                       |
| Type of chemotherapy                                    |                  |                       |
| Anthracycline- and taxane-based                         | 1 [Reference]    | .28                   |
| Anthracycline-based                                     | 0.87 (0.42-1.80) |                       |
| CMF-based                                               | 2.49 (0.78-7.95) |                       |
| Timing of chemotherapy                                  |                  |                       |
| Adjuvant therapy                                        | 1 [Reference]    | .02                   |
| Neoadjuvant therapy                                     | 2.61 (1.24-5.48) |                       |
| Use of GnRHa after the end of chemotherapy <sup>c</sup> |                  |                       |
| No                                                      | 1 [Reference]    | .25                   |
| Yes                                                     | 0.66 (0.33-1.32) |                       |

<sup>a</sup> Overall survival interval was computed from the date of randomization to the date of the death. Observation times of patients without an overall survival event were censored on the date of last contact. HR = hazard ratio; CI = confidence interval; GnRHa = gonadotropin-releasing hormone analogs; ER = estrogen receptor; PR = progesterone receptor; CMF = cyclophosphamide, methotrexate, fluorouracil.

<sup>b</sup> Two-sided Likelihood-ratio test.

<sup>c</sup> Time-dependent.

**Supplementary Table 5.** Pregnancy outcome according to treatment arm

| Pregnancy outcome    | Control arm (n = 133) | GnRHa arm (n = 148) |
|----------------------|-----------------------|---------------------|
|                      | No. (%)               | No. (%)             |
| No pregnancy         | 129 (97.0)            | 139 (93.9)          |
| At term              | 3 (2.3)               | 4 (2.7)             |
| Spontaneous abortion | 0 (0)                 | 2 (1.4)             |
| Induced abortion     | 0 (0)                 | 2 (1.4)             |
| Preterm birth        | 0 (0)                 | 1 (0.7)             |
| Unknown              | 1 (0.8)               | 0 (0)               |

<sup>a</sup>GnRHa = gonadotropin-releasing hormone analogs

**Supplementary Table 6.** Baseline patient and tumor characteristics according to *BRCA* status

| Characteristics                                                                                 | <i>BRCA</i> -mutated (n = 10) | <i>BRCA</i> -not mutated (n = 33) | <i>BRCA</i> -not tested (n = 238) |
|-------------------------------------------------------------------------------------------------|-------------------------------|-----------------------------------|-----------------------------------|
| Median age (range), y                                                                           | 34.5 (29-44)                  | 36 (24-44)                        | 40 (24-45)                        |
| Tumor size (T) , No. (%)                                                                        |                               |                                   |                                   |
| pT1                                                                                             | 6 (60.0)                      | 25 (75.8)                         | 134 (56.3)                        |
| pT2-4                                                                                           | 4 (40.0)                      | 8 (24.2)                          | 98 (41.2)                         |
| Unknown                                                                                         | 0 (0)                         | 0 (0)                             | 6 (2.5)                           |
| Axillary nodes (N), No. (%)                                                                     |                               |                                   |                                   |
| pN0                                                                                             | 3 (30.0)                      | 20 (60.6)                         | 105 (44.1)                        |
| pN1-2                                                                                           | 7 (70.0)                      | 13 (39.4)                         | 127 (53.4)                        |
| Unknown                                                                                         | 0 (0)                         | 0 (0)                             | 6 (2.5)                           |
| Hormone receptor status, No. (%)                                                                |                               |                                   |                                   |
| ER-negative and PR-negative                                                                     | 3 (30.0)                      | 9 (27.3)                          | 39 (16.4)                         |
| ER-positive, PR-positive, or both                                                               | 7 (70.0)                      | 24 (72.7)                         | 195 (81.9)                        |
| Unknown                                                                                         | 0 (0)                         | 0 (0)                             | 4 (1.7)                           |
| Timing of chemotherapy, No. (%)                                                                 |                               |                                   |                                   |
| Adjuvant therapy                                                                                | 9 (90.0)                      | 30 (90.9)                         | 211 (88.7)                        |
| Neoadjuvant therapy                                                                             | 1 (10.0)                      | 3 (9.1)                           | 19 (8.0)                          |
| Not begun                                                                                       | 0 (0)                         | 0 (0)                             | 8 (3.4)                           |
| Type of chemotherapy, No. (%)                                                                   |                               |                                   |                                   |
| Anthracycline-based                                                                             | 3 (30.0)                      | 11 (33.3)                         | 99 (41.6)                         |
| Anthracycline- and taxane-based                                                                 | 7 (70.0)                      | 19 (57.6)                         | 122 (51.3)                        |
| CMF-based                                                                                       | 0 (0)                         | 3 (9.1)                           | 9 (3.8)                           |
| Median cumulative cyclophosphamide dose (IQR), mg/m <sup>2</sup>                                | 3660.5 (3350-3840)            | 3920 (3600-5390)                  | 4100 (3710-5627)                  |
| Median duration of chemotherapy (IQR), wk                                                       | 20.9 (16-21)                  | 19 (15.1-21.3)                    | 16.4 (15-21.3)                    |
| Type of adjuvant endocrine therapy in hormone receptor–positive patients <sup>a</sup> , No. (%) |                               |                                   |                                   |
| No treatment                                                                                    | 0 (0)                         | 0 (0)                             | 10 (5.1)                          |
| GnRHa alone                                                                                     | 0 (0)                         | 1 (4.2)                           | 8 (4.1)                           |
| GnRHa + tamoxifen                                                                               | 4 (57.1)                      | 17 (70.8)                         | 105 (53.9)                        |
| GnRHa + aromatase inhibitor                                                                     | 0 (0)                         | 0 (0)                             | 4 (2.1)                           |
| Tamoxifen                                                                                       | 1 (14.3)                      | 2 (8.3)                           | 49 (25.1)                         |
| Tamoxifen followed by aromatase inhibitor                                                       | 2 (28.6)                      | 4 (16.7)                          | 19 (9.7)                          |

|                                               |               |                 |               |
|-----------------------------------------------|---------------|-----------------|---------------|
| Median duration of endocrine therapy (IQR), y | 5.0 (5.0-5.2) | 5.0 (4.96-5.06) | 5.0 (4.8-5.1) |
| Median duration of adjuvant GnRHa (IQR), y    | 3.4 (3.2-5.0) | 4.6 (3.8-5.0)   | 3.9 (2.0-5.0) |

<sup>a</sup> Percentages calculated on the total number of patients with hormone receptor–positive disease (24 in the *BRCA* not mutated group, 7 in the *BRCA* mutated group, 195 in the *BRCA* not tested group). CMF = cyclophosphamide, methotrexate, fluorouracil; ER = estrogen receptor; PR = progesterone receptor; IQR = interquartile range; GnRHa = gonadotropin-releasing hormone analogs; NA = not applicable.



**Supplementary Figure 1.** Cumulative incidence of pregnancy after breast cancer according to treatment arm. GnRHa = gonadotropin-releasing hormone analogs.

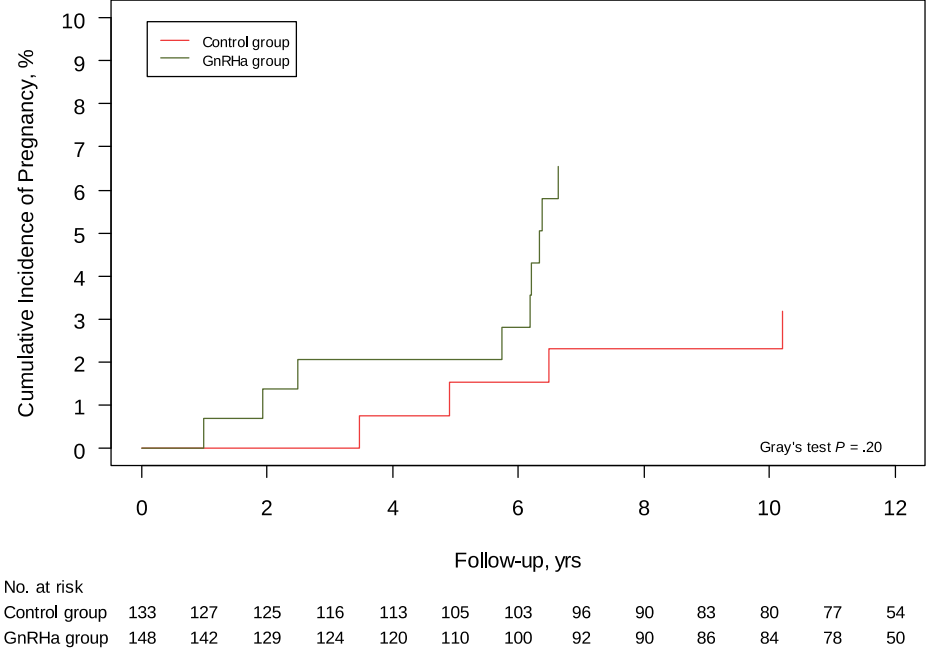

Supplement: djab213_supplementary_data.pdf [file djab213_supplementary_data.pdf]
